# Supplementary material for: Synthesis, coordination chemistry and photophysical properties of naphtho-fused pyrazole ligands
Source: Royal Society of Chemistry journal article supplement (doi:10.1039/c9ce01074b), 2019-01-01
Supplement: c9ce01074b1.pdf [file c9ce01074b1.pdf]

# Synthesis, coordination chemistry and photophysical properties of naphtho-fused pyrazole ligands

## Supporting Information

Rohan J. Weekes<sup>a</sup> and Chris S. Hawes<sup>\*a</sup>

<sup>a</sup>School of Chemical and Physical Sciences, Keele University, Keele ST5 5BG, U.K.

Email: [c.s.hawes@keele.ac.uk](mailto:c.s.hawes@keele.ac.uk)

### Contents:

|                                      |    |
|--------------------------------------|----|
| 1. Spectroscopic Data                | 2  |
| 2. X-ray Powder Diffraction Patterns | 8  |
| 3. NMR Spectra                       | 11 |

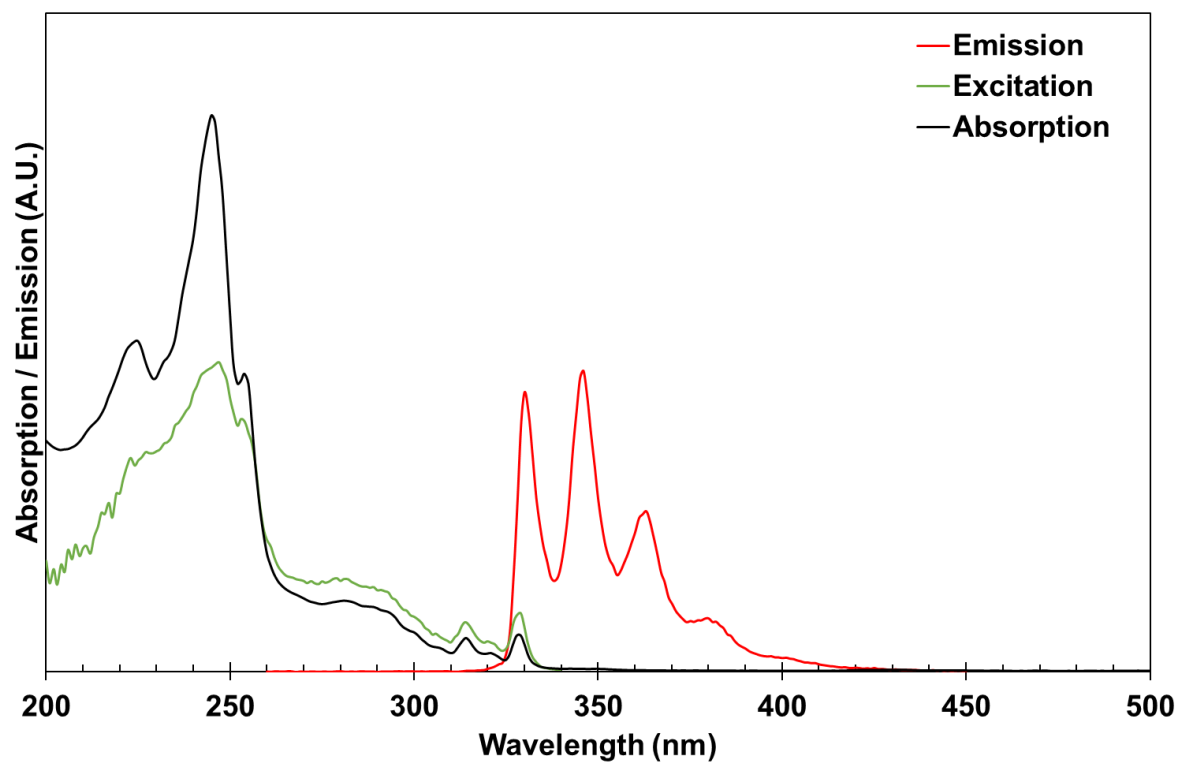

**Figure S1** Absorption, emission ( $\lambda_{\text{ex}} = 245 \text{ nm}$ ) and excitation ( $\lambda_{\text{em}} = 345 \text{ nm}$ ) for **HL1** in MeCN (17  $\mu\text{M}$ ).

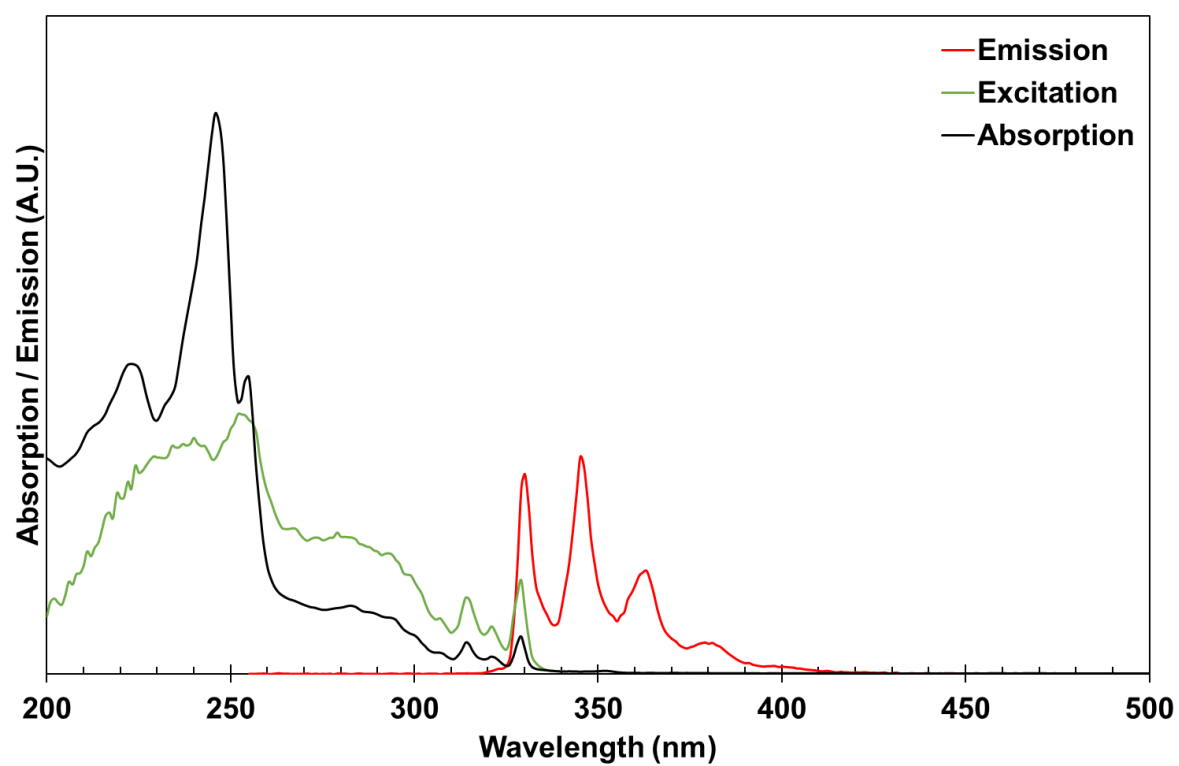

**Figure S2** Absorption, emission ( $\lambda_{\text{ex}} = 245 \text{ nm}$ ) and excitation ( $\lambda_{\text{em}} = 345 \text{ nm}$ ) for **HL1** in hexane (35  $\mu\text{M}$ ).

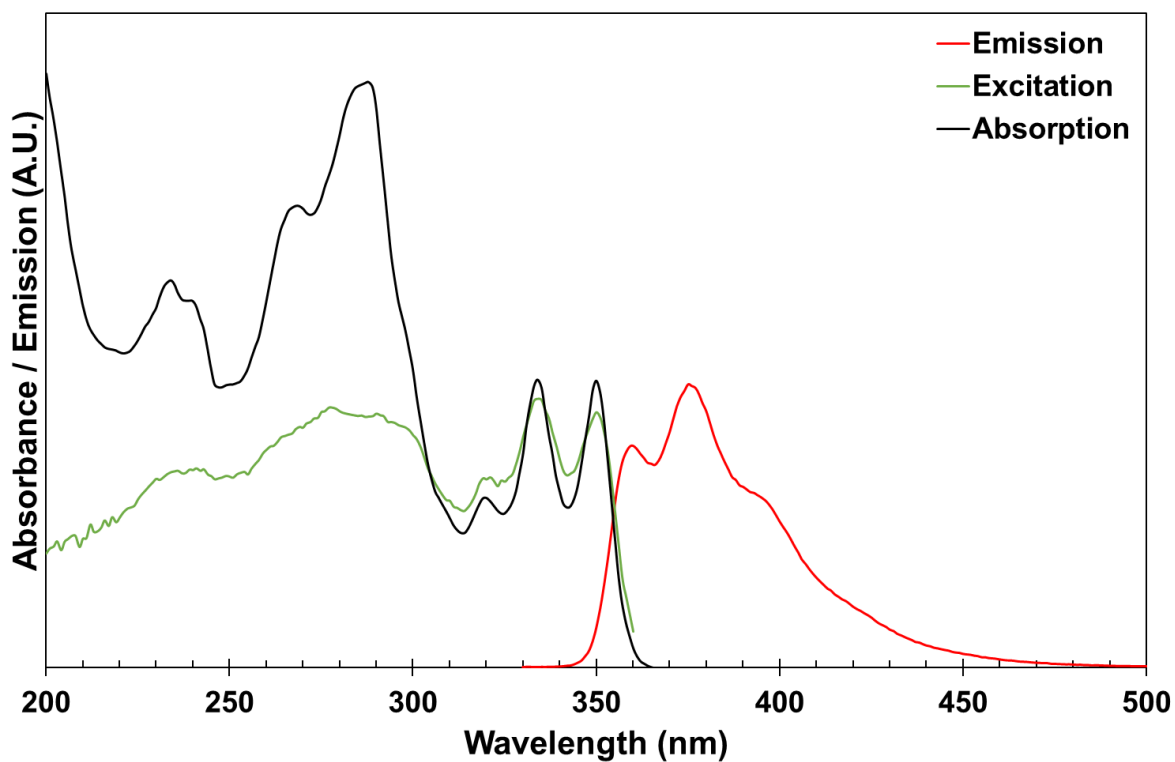

**Figure S3** Absorption, emission ( $\lambda_{\text{ex}} = 320 \text{ nm}$ ) and excitation ( $\lambda_{\text{em}} = 373 \text{ nm}$ ) for **L2** in MeCN (30  $\mu\text{M}$ ).

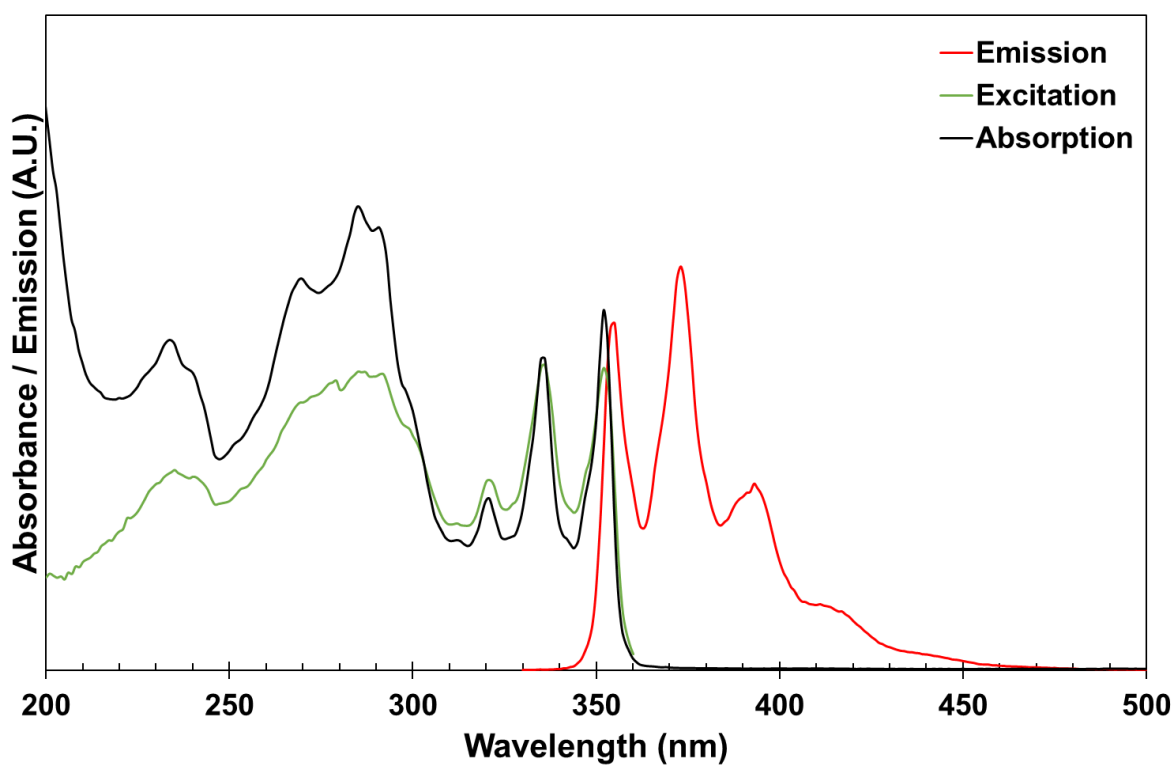

**Figure S4** Absorption, emission ( $\lambda_{\text{ex}} = 320 \text{ nm}$ ) and excitation ( $\lambda_{\text{em}} = 373 \text{ nm}$ ) for **L2** in hexane (15  $\mu\text{M}$ ).

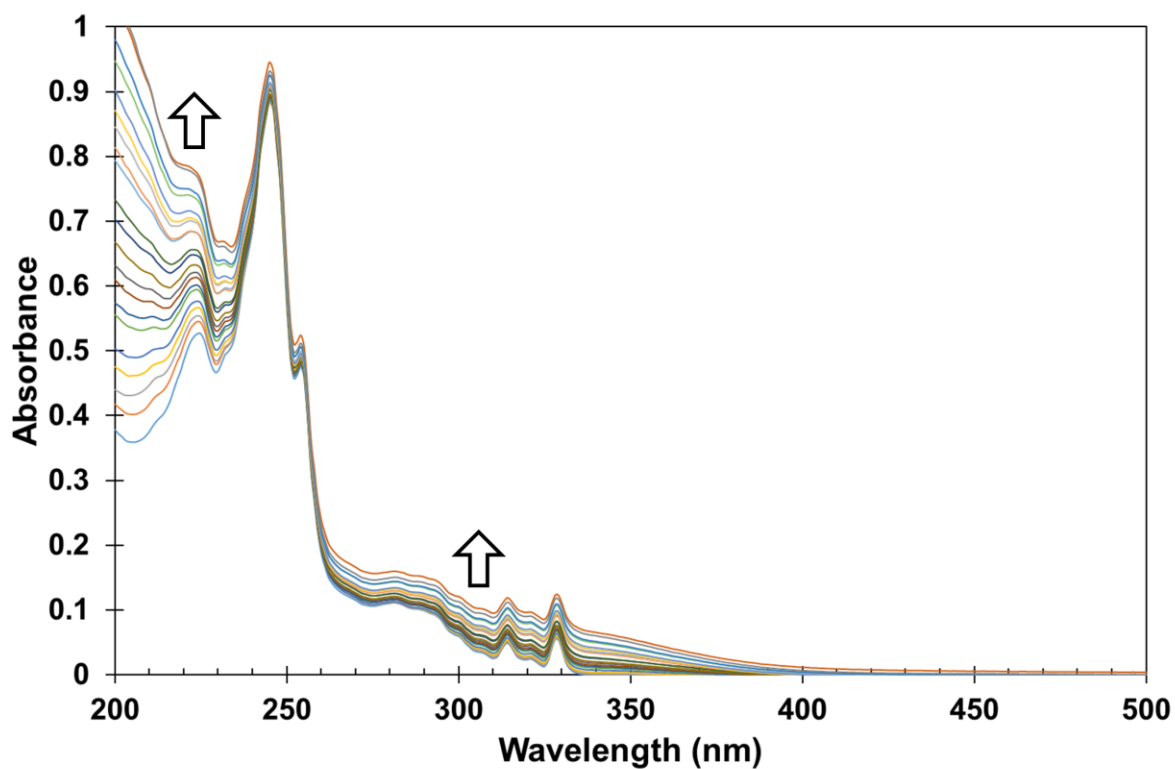

**Figure S5** Absorption spectra for **HL1** following sequential additions of Cu(NO<sub>3</sub>)<sub>2</sub>·2.5H<sub>2</sub>O at 23 μM concentration in acetonitrile, up to a maximum of 1.4 equivalents.

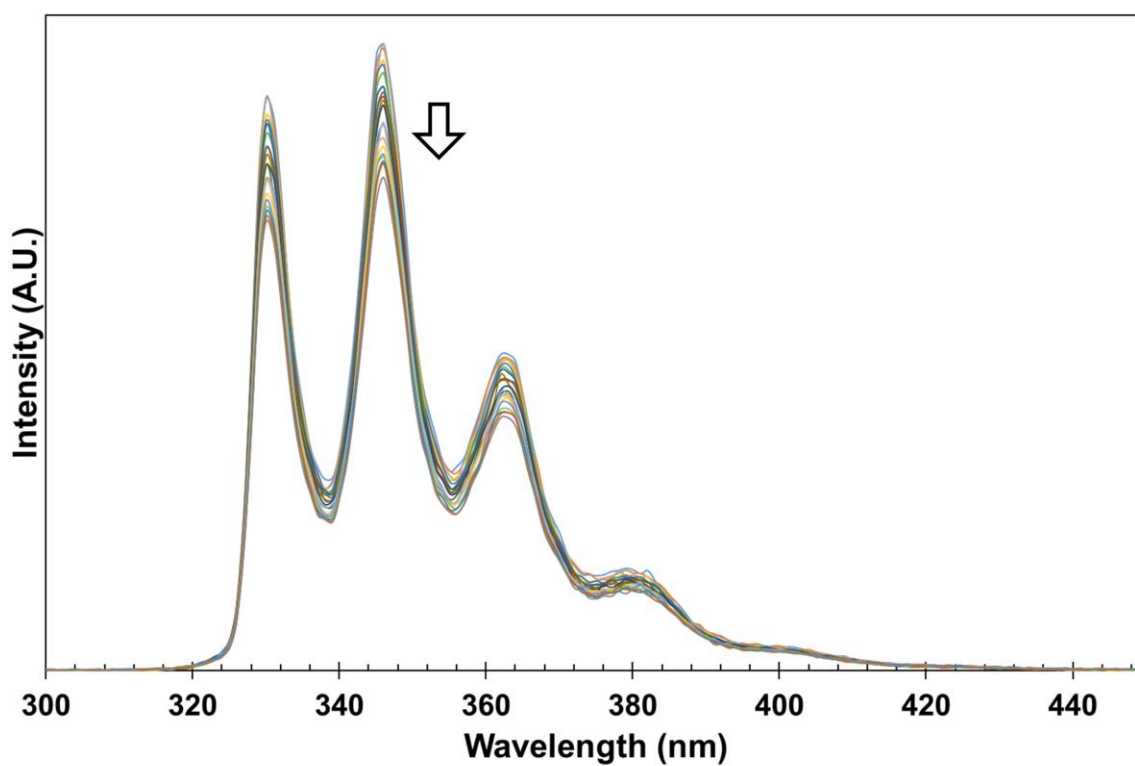

**Figure S6** Emission spectra ( $\lambda_{\text{ex}} = 245 \text{ nm}$ ) for **HL1** following sequential additions of Cu(NO<sub>3</sub>)<sub>2</sub>·2.5H<sub>2</sub>O at 23 μM concentration in acetonitrile, up to a maximum of 1.4 equivalents.

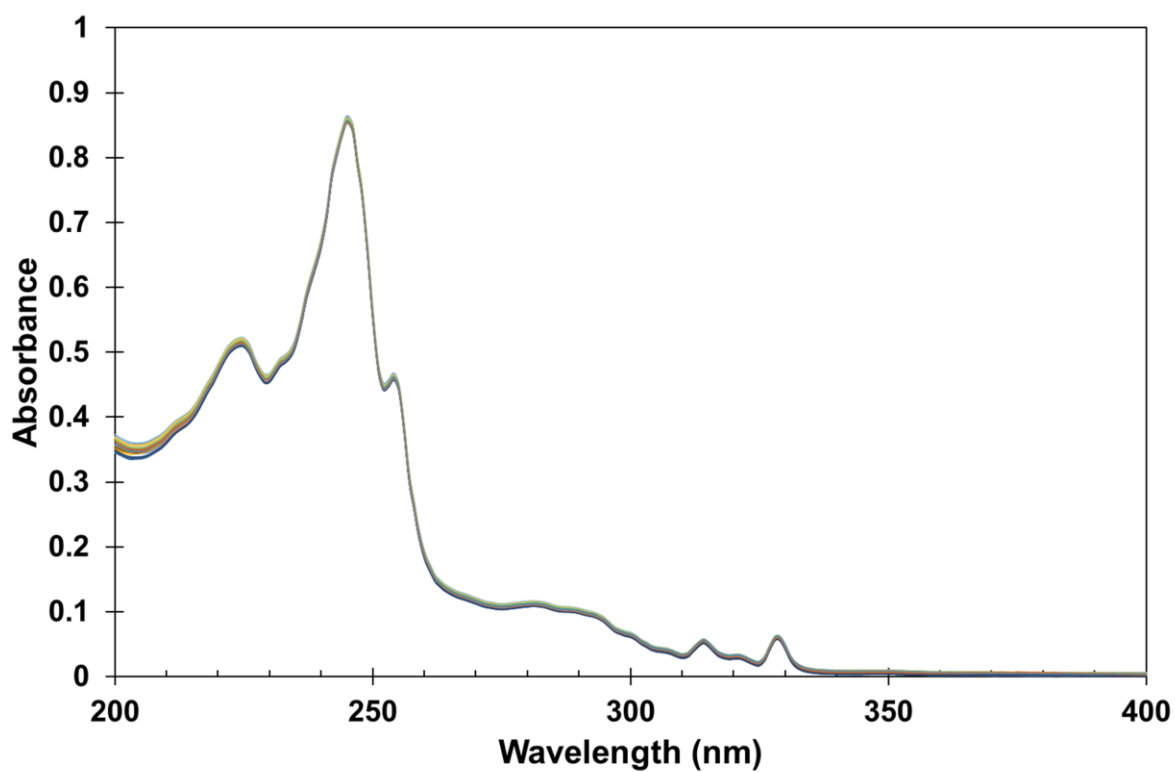

**Figure S7** Absorption spectra for **HL1** following sequential additions of ZnCl<sub>2</sub> at 23  $\mu$ M concentration in acetonitrile up to a maximum of 1.6 equivalents.

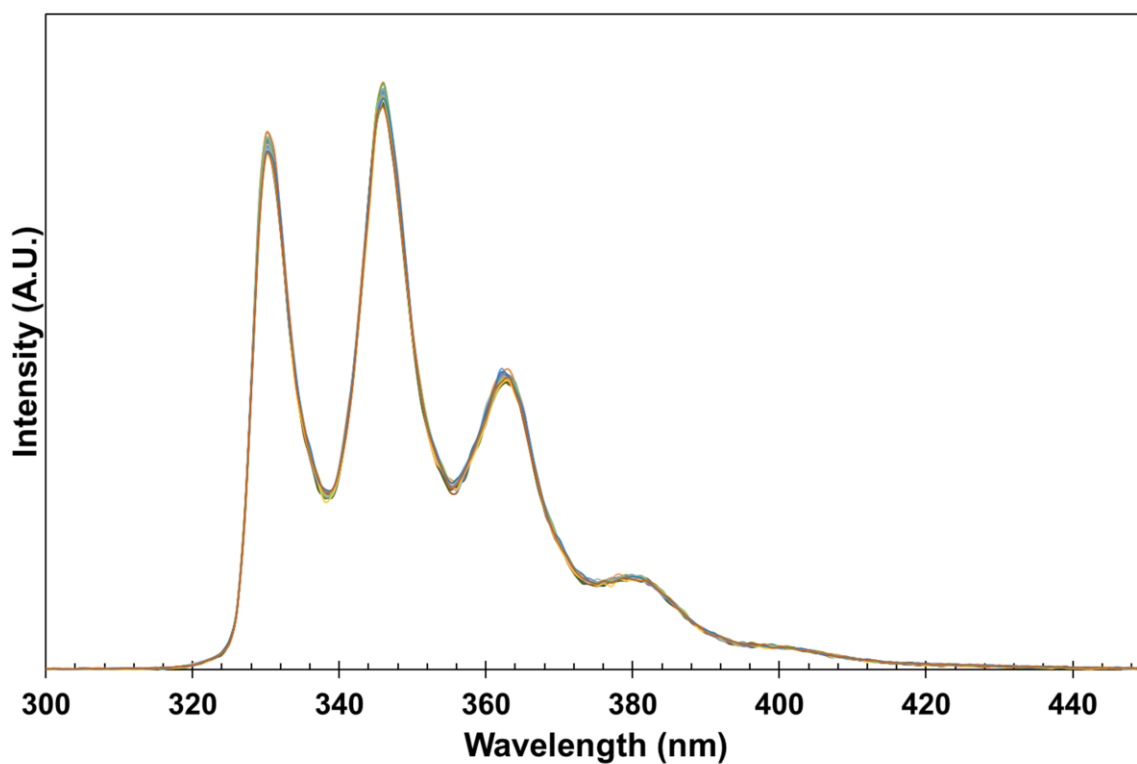

**Figure S8** Emission spectra ( $\lambda_{\text{ex}} = 245$  nm) for **HL1** following sequential additions of ZnCl<sub>2</sub> at 23  $\mu$ M concentration in acetonitrile up to a maximum of 1.6 equivalents.

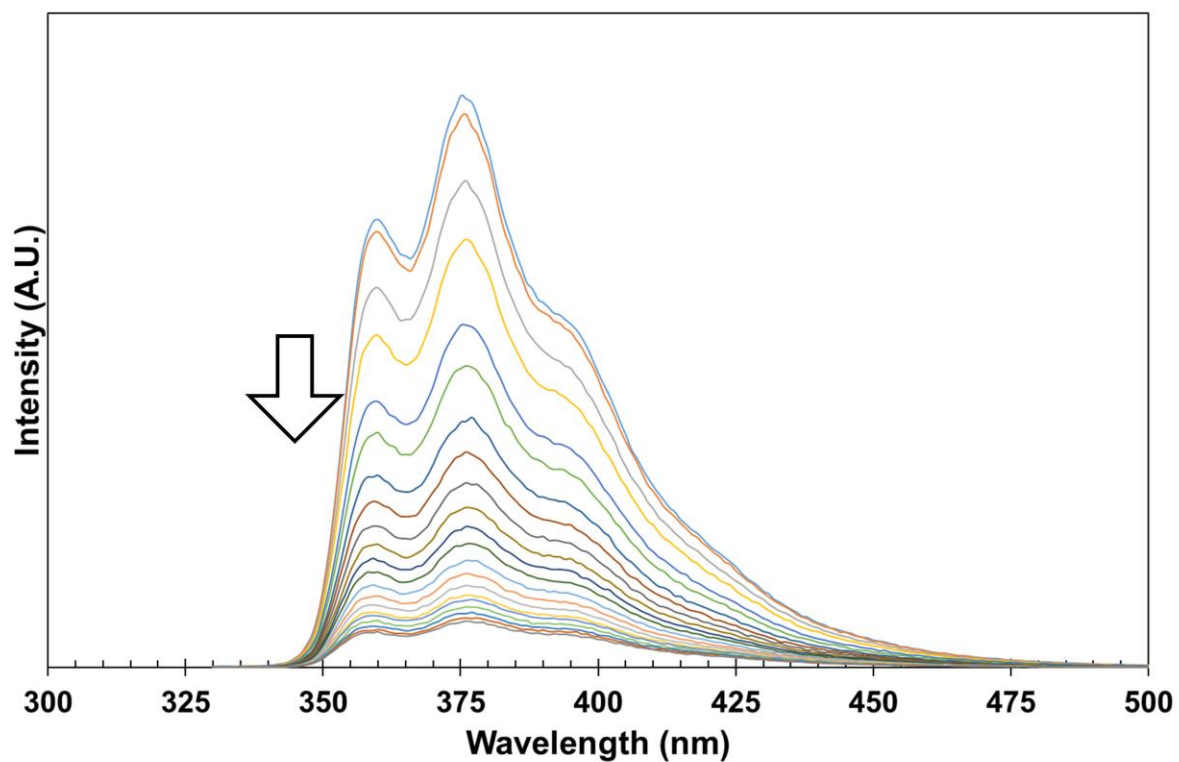

**Figure S9** Emission spectra ( $\lambda_{\text{ex}} = 320 \text{ nm}$ ) for **L2** at  $30 \mu\text{M}$  following sequential additions of  $\text{Cu}(\text{NO}_3)_2 \cdot 2.5\text{H}_2\text{O}$  up to a maximum of 1.4 equivalents.

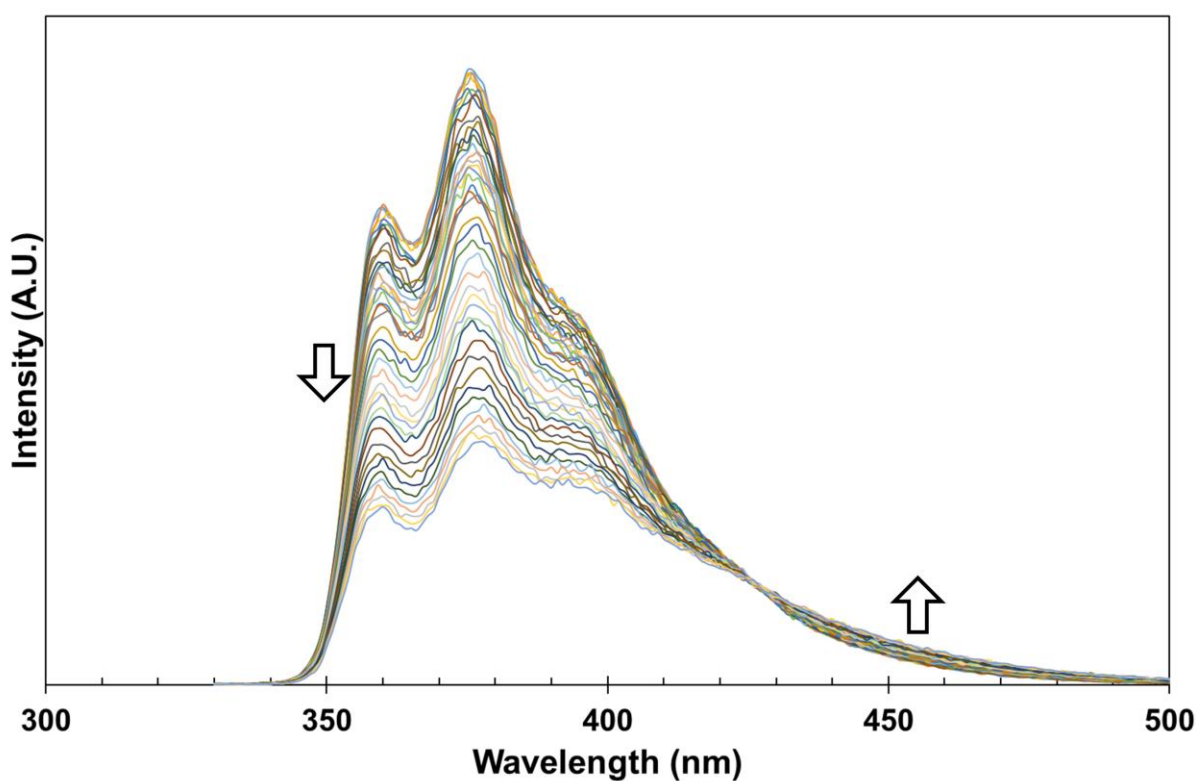

**Figure S10** Emission spectra ( $\lambda_{\text{ex}} = 320 \text{ nm}$ ) for **L2** at  $30 \mu\text{M}$  following sequential additions of  $\text{ZnCl}_2$  up to a maximum of 12 equivalents.

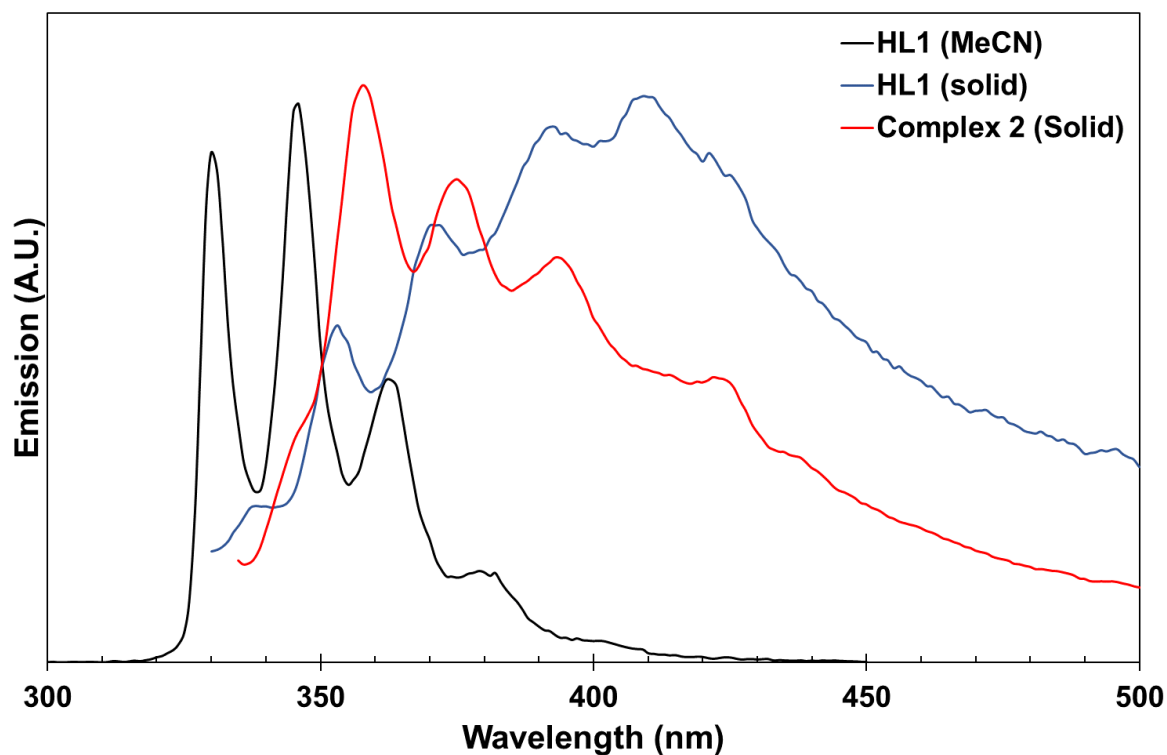

**Figure S11** Overlaid emission spectra for **HL1** in solution (MeCN 17  $\mu$ M,  $\lambda_{\text{ex}}$  = 245 nm, black), solid **HL1** (blue,  $\lambda_{\text{ex}}$  = 300 nm), and solid complex **2** (red,  $\lambda_{\text{ex}}$  = 320 nm)

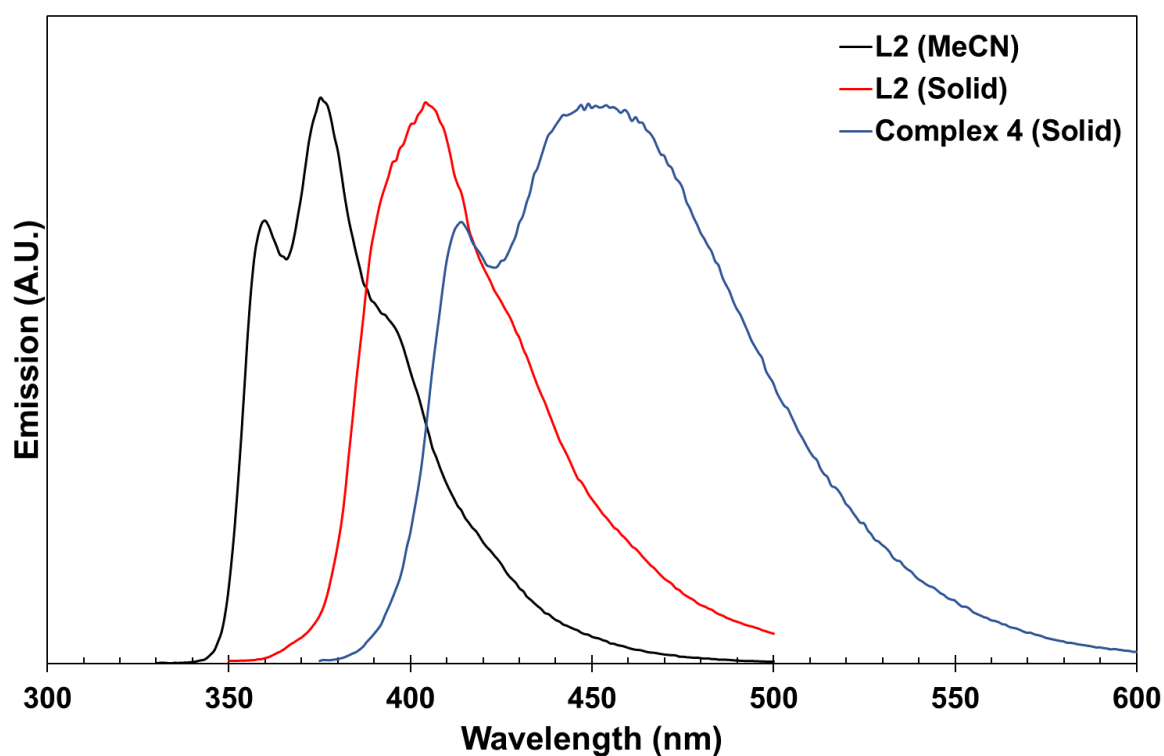

**Figure S12** Overlaid emission spectra for **L2** in solution (MeCN 30  $\mu$ M,  $\lambda_{\text{ex}}$  = 320 nm, black), solid **L2** (red,  $\lambda_{\text{ex}}$  = 300 nm), and solid complex **4** (red,  $\lambda_{\text{ex}}$  = 320 nm)

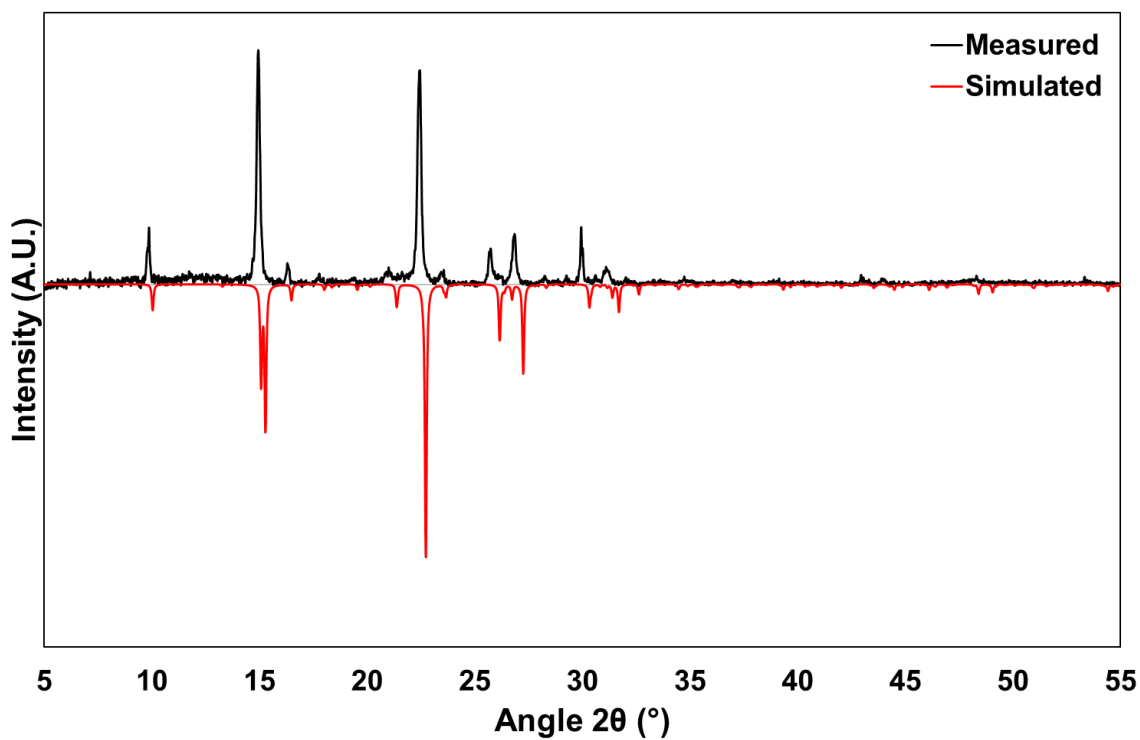

**Figure S13** X-ray powder diffraction pattern for **HL1**, showing measured data (black, room temperature) and pattern simulated from single crystal data at 150 K (red)

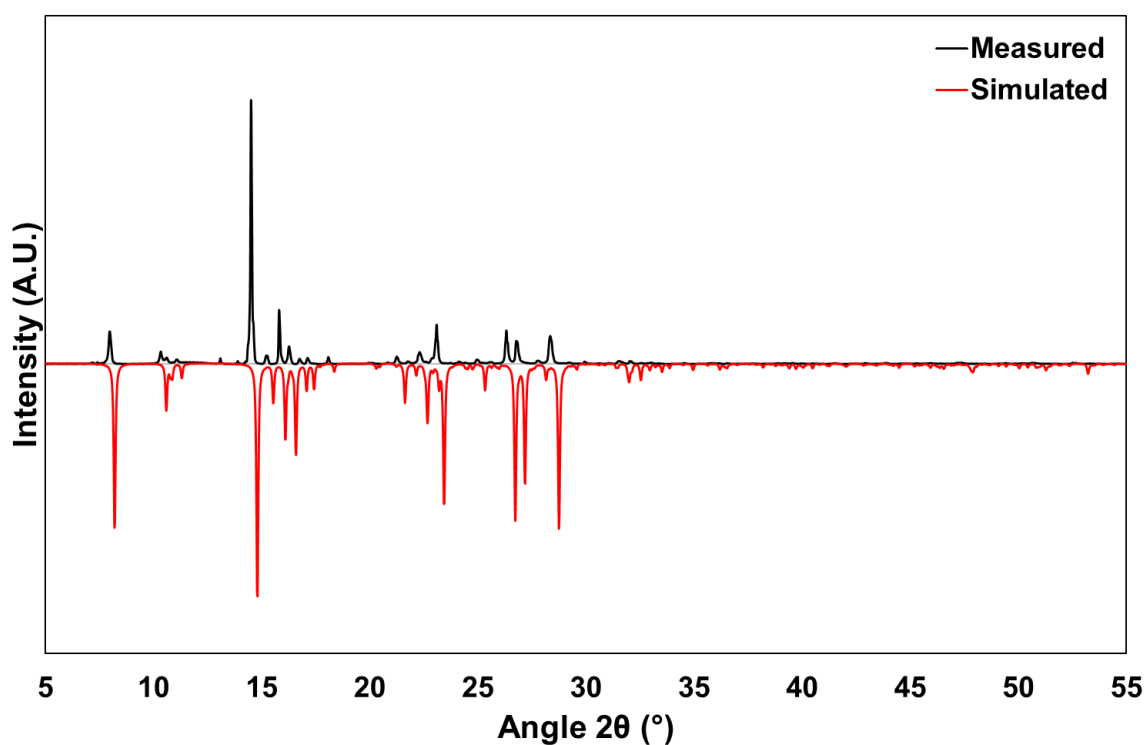

**Figure S14** X-ray powder diffraction pattern for **L2**, showing measured data (black, room temperature) and pattern simulated from single crystal data at 150 K (red)



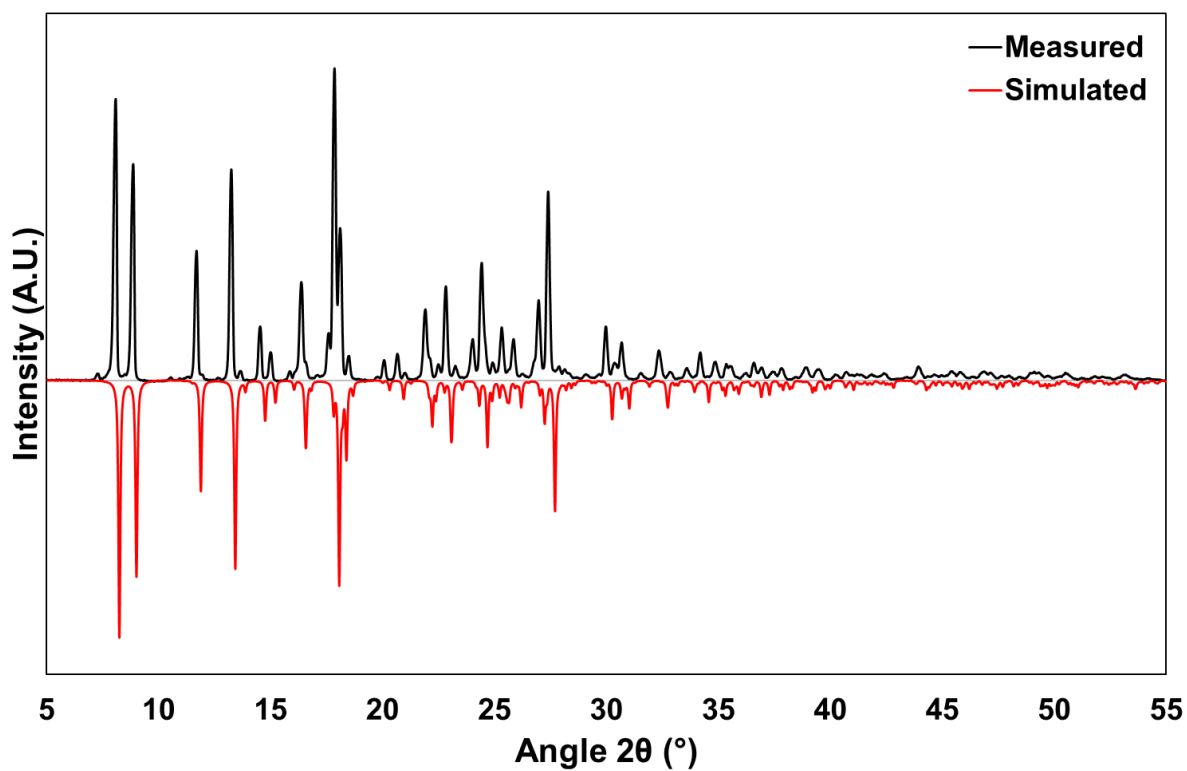

**Figure S15** X-ray powder diffraction pattern for complex **1**, showing measured data (black, room temperature) and pattern simulated from single crystal data at 150 K (red)

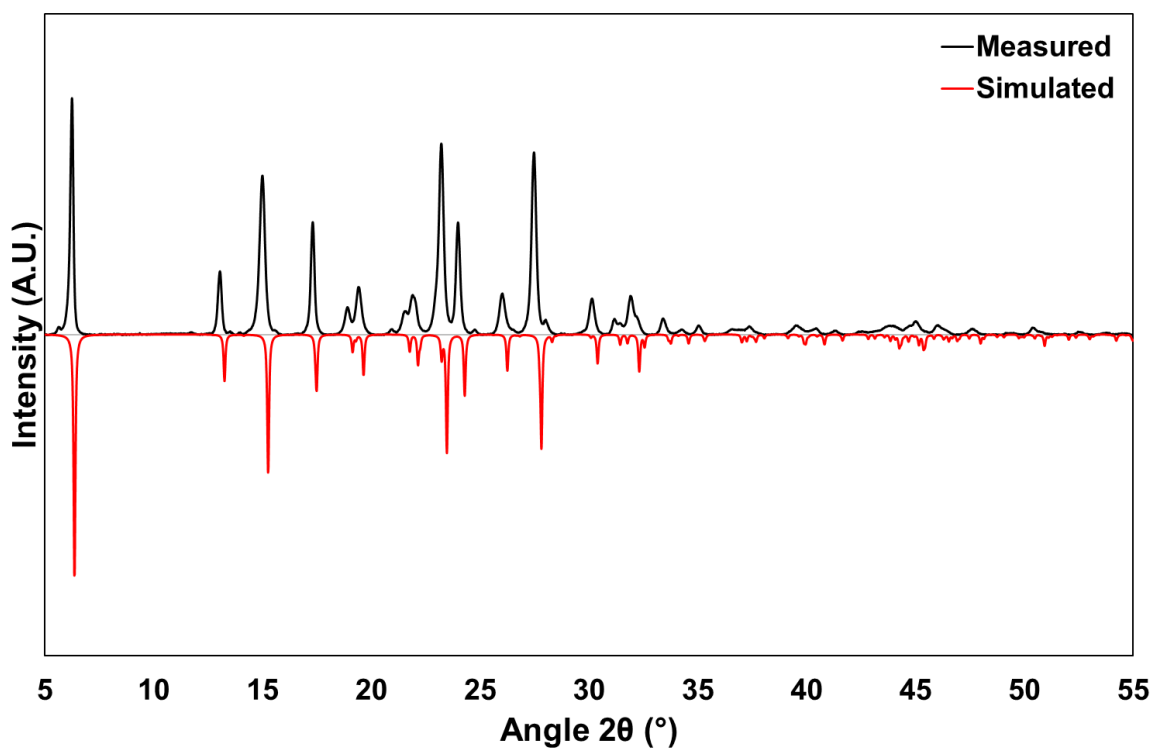

**Figure S16** X-ray powder diffraction pattern for complex **2**, showing measured data (black, room temperature) and pattern simulated from single crystal data at 150 K (red)

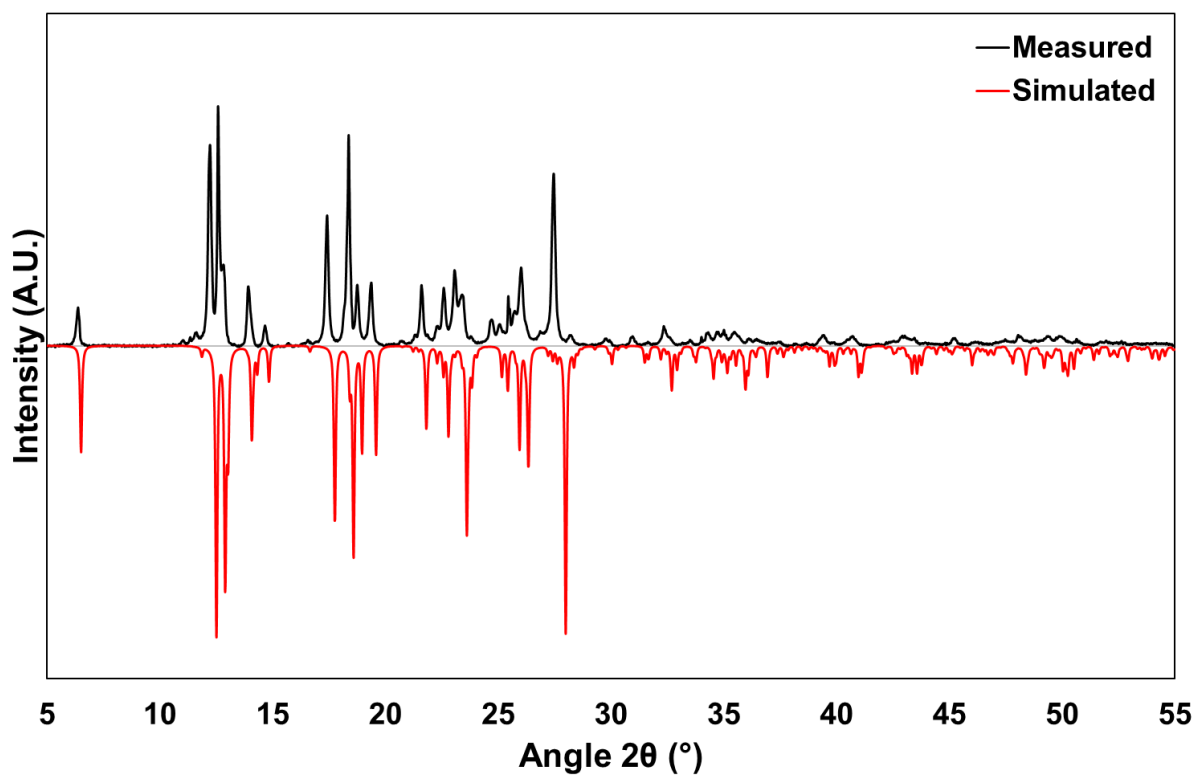

**Figure S17** X-ray powder diffraction pattern for complex **3**, showing measured data (black, room temperature) and pattern simulated from single crystal data at 150 K (red)

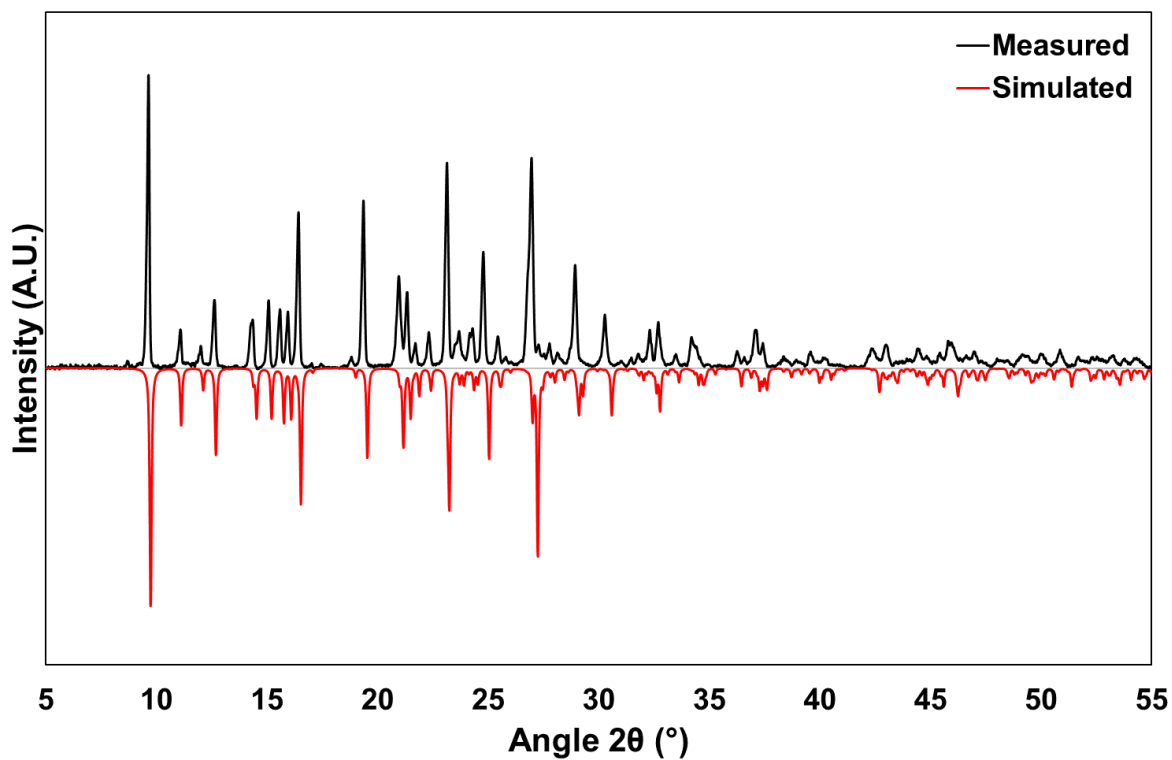

**Figure S18** X-ray powder diffraction pattern for complex **3**, showing measured data (black, room temperature) and pattern simulated from single crystal data at 150 K (red)

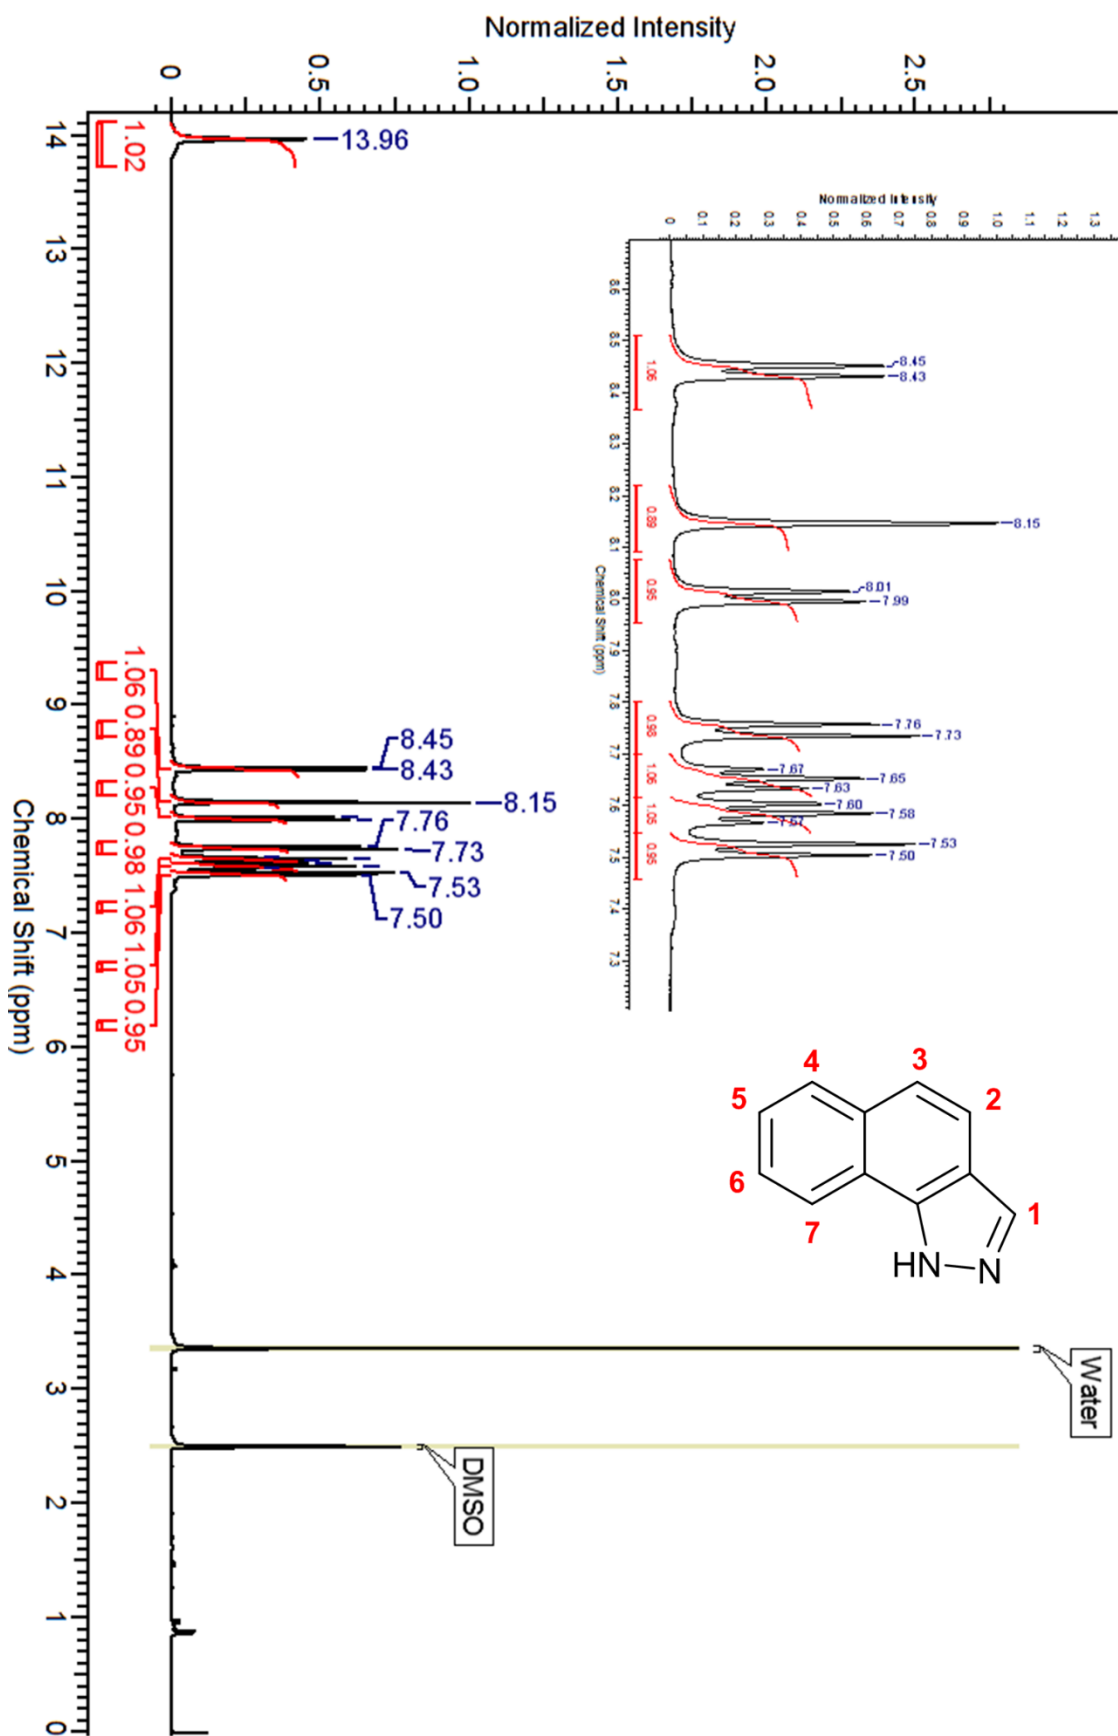

**Figure S19**  $^1\text{H}$  NMR spectrum for **HL1** ( $\text{d}_6\text{-DMSO}$ , 400 MHz), with proton numbering scheme

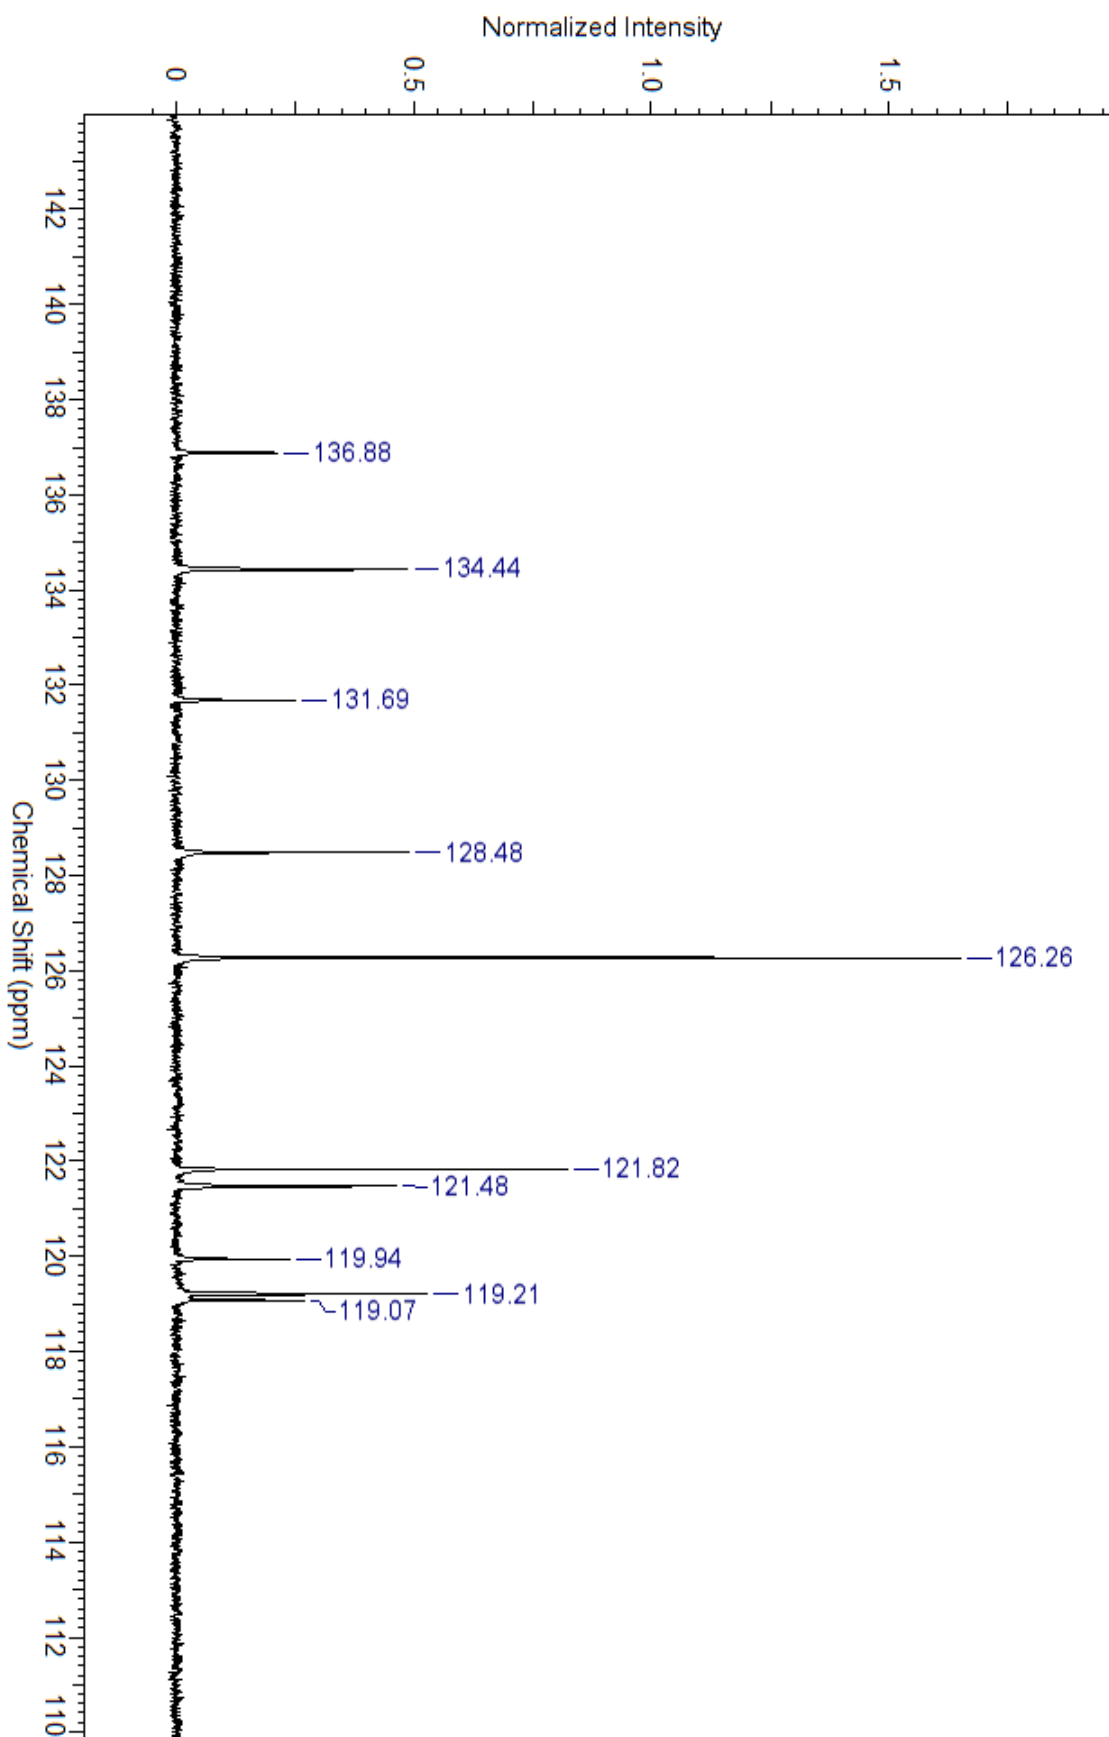

**Figure S20**  $^{13}\text{C}$  NMR spectrum for **HL1** ( $\text{d}_6\text{-DMSO}$ , 100 MHz)

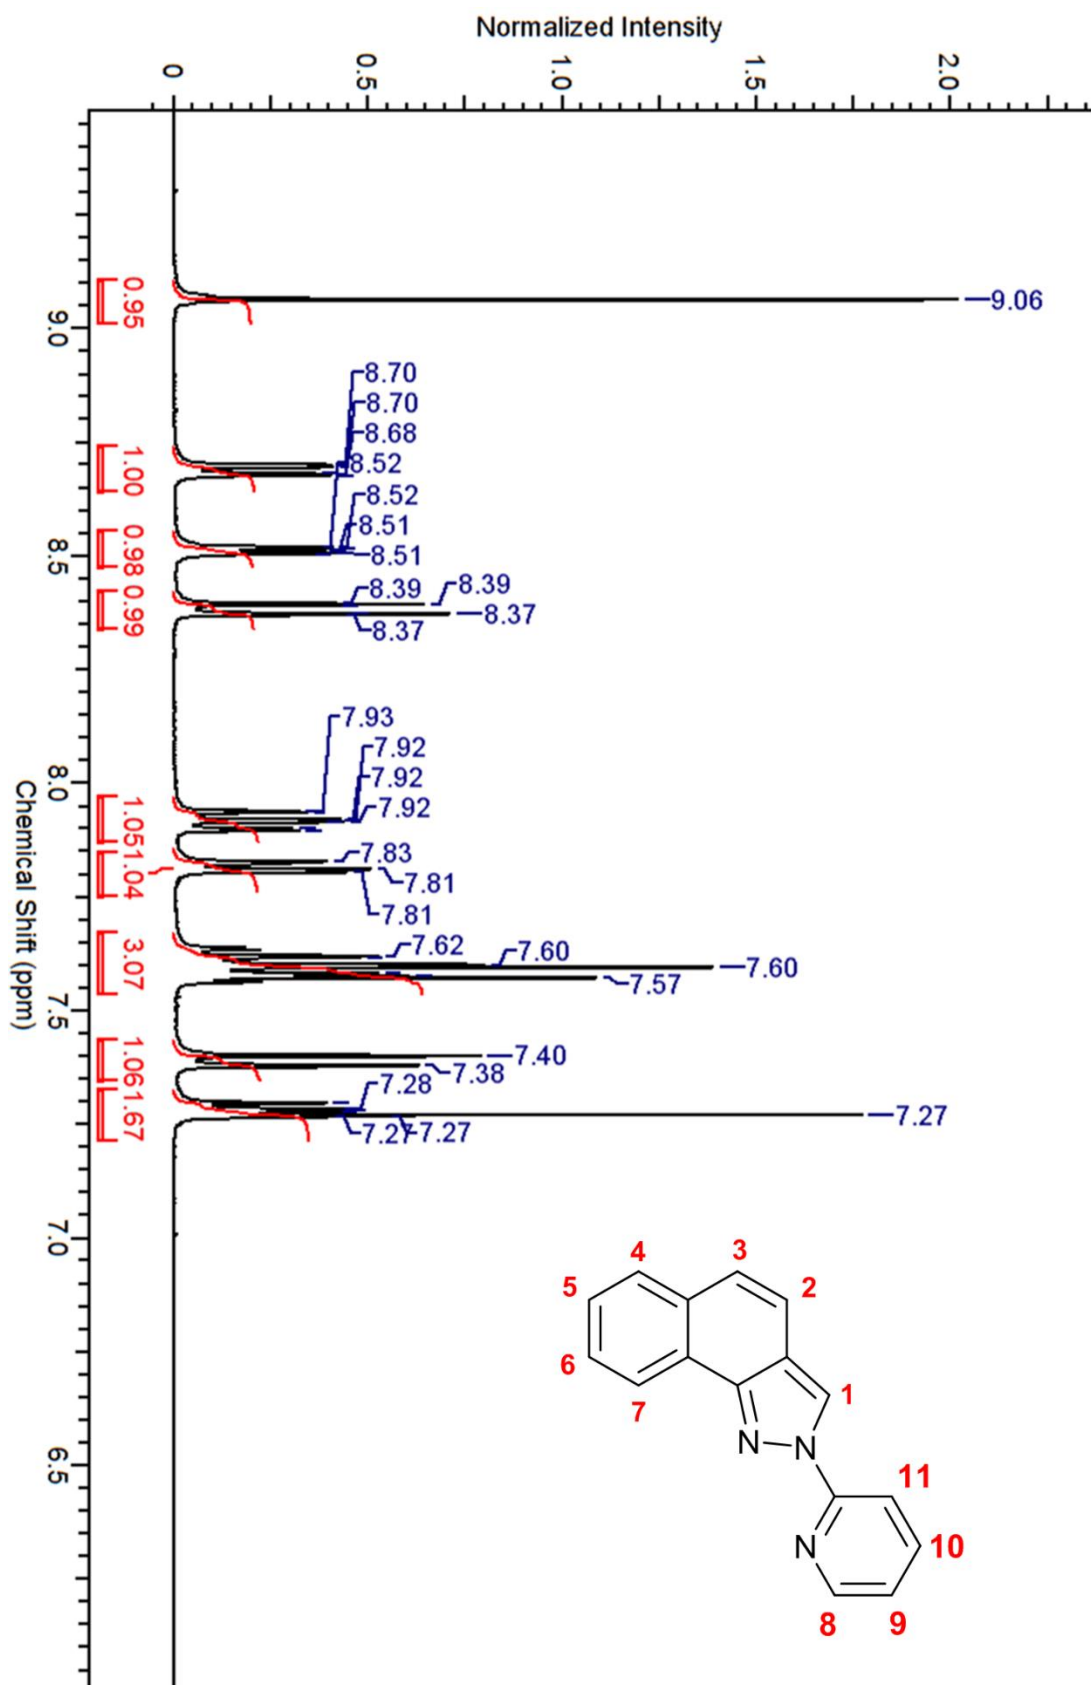

Figure S21  $^1\text{H}$  NMR spectrum for **L2** ( $\text{CDCl}_3$ , 400 MHz) with proton numbering scheme

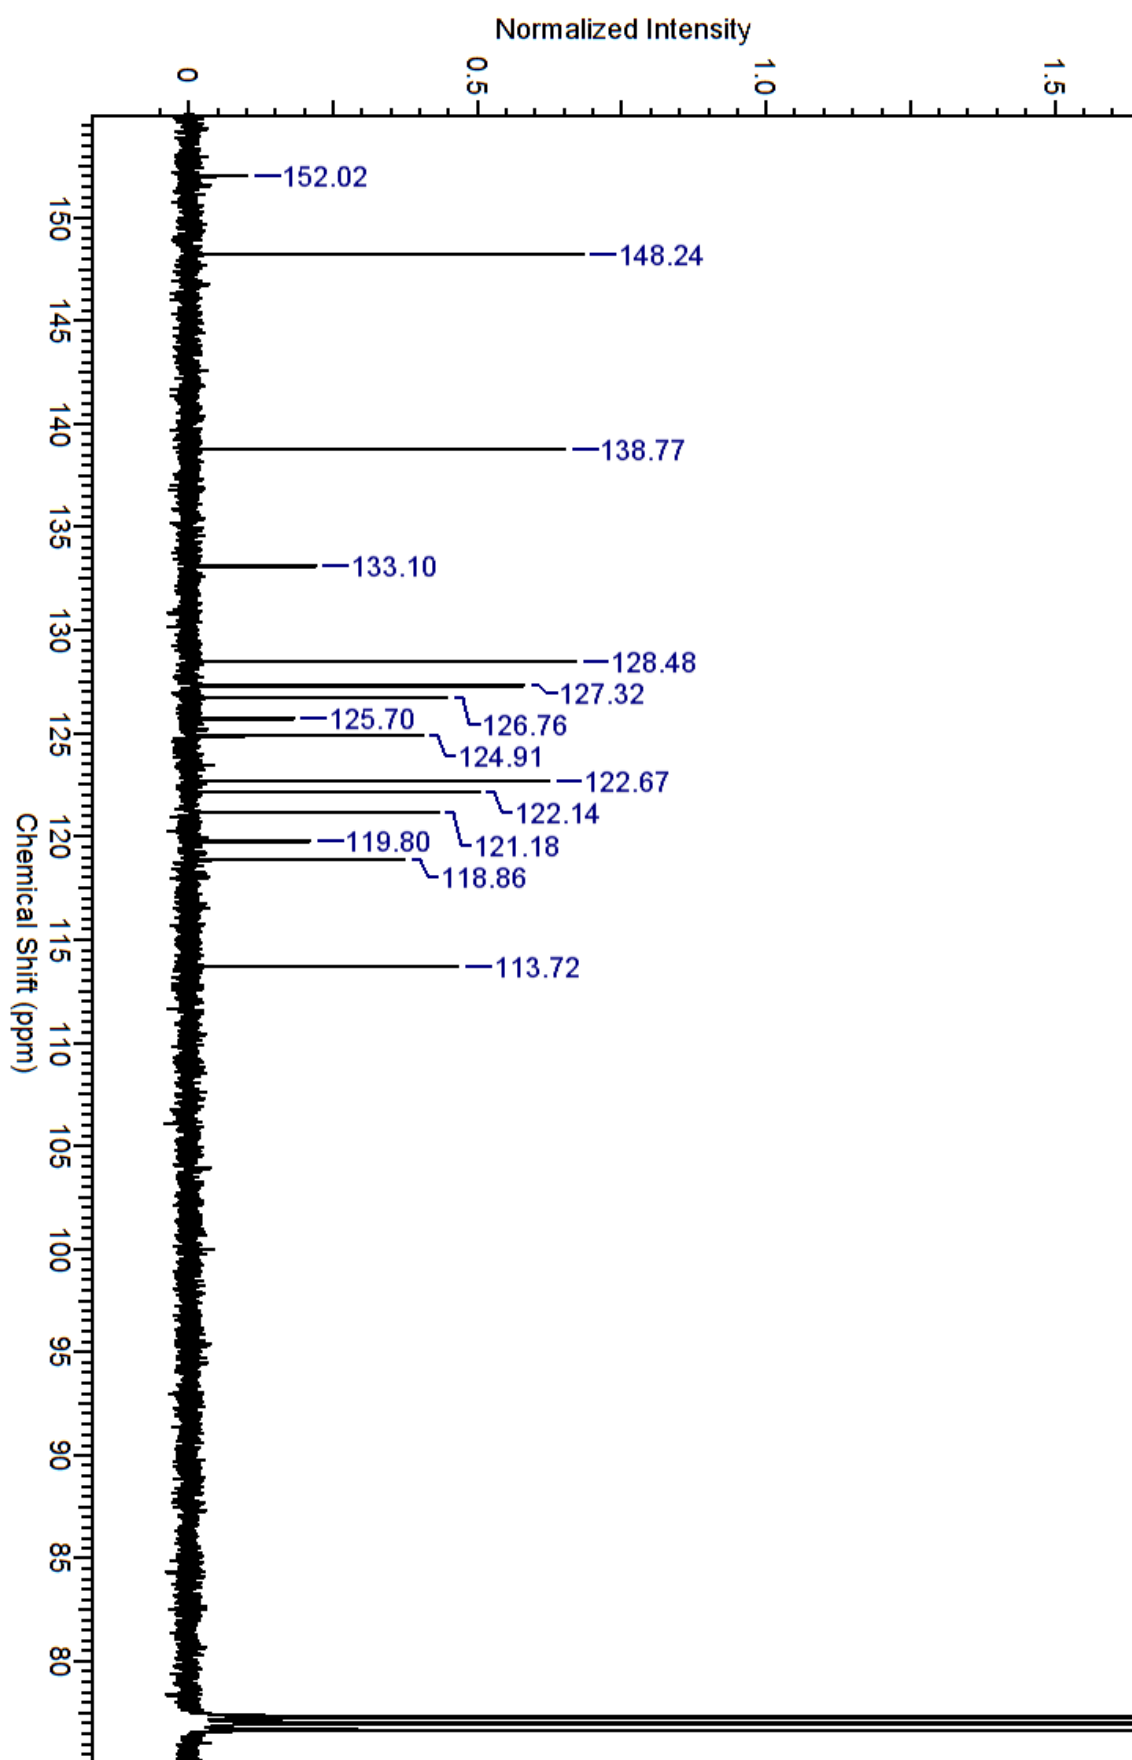

Figure S22  $^{13}\text{C}$  NMR spectrum for **L2** ( $\text{CDCl}_3$ , 100 MHz)
